# Supplementary material for: Building the sugarcane genome for biotechnology and identifying evolutionary trends
Source: PubMed Central journal article supplement (PMC4122759; doi:10.1186/1471-2164-15-540), 2014-06-30

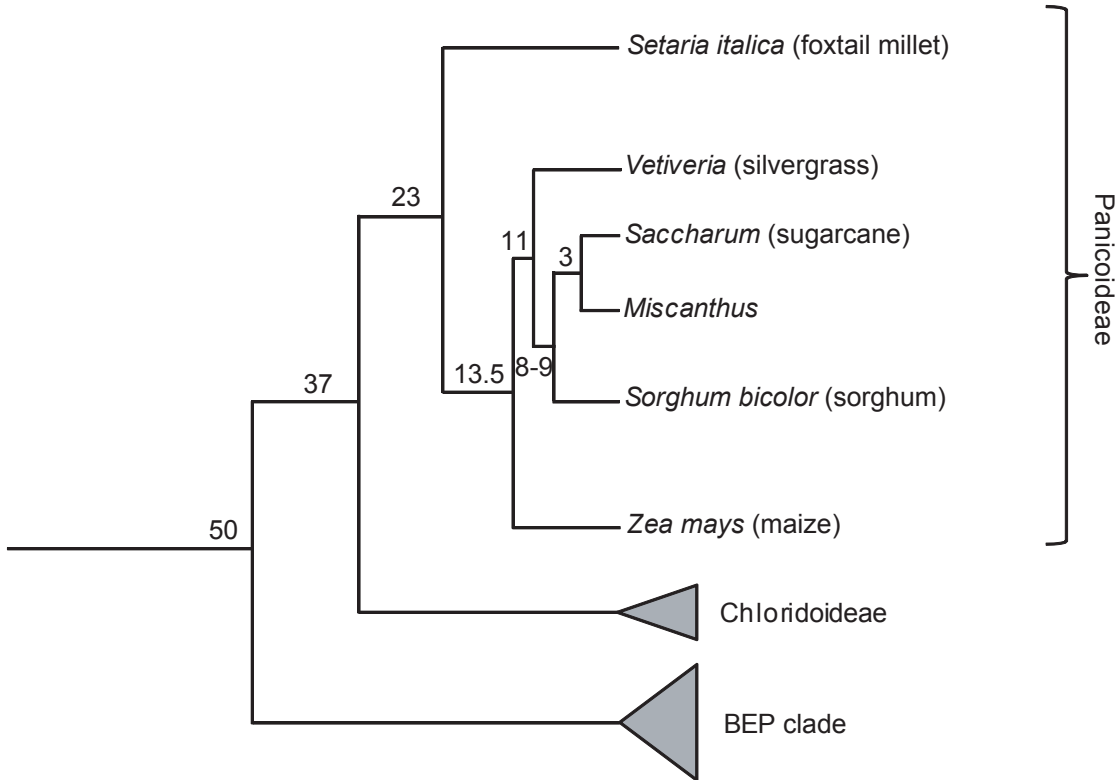

Supplement: 12864_2013_6311_MOESM1_ESM.pdf [file 12864_2013_6311_MOESM1_ESM.pdf]
