# Supplementary material for: Building the sugarcane genome for biotechnology and identifying evolutionary trends
Source: PubMed Central journal article supplement (PMC4122759; doi:10.1186/1471-2164-15-540), 2014-06-30
Supplement: 12864_2013_6311_MOESM4_ESM.pdf [file 12864_2013_6311_MOESM4_ESM.pdf]

**Table S3. Summary of repeat content of sugarcane BACs.**

|                                 | <b># Elements</b> | <b>Total length (Kb)</b> | <b>%</b> |
|---------------------------------|-------------------|--------------------------|----------|
| Retroelements                   | 10234             | 13017.47                 | 35.59    |
| SINEs                           | 66                | 7.95                     | 0.02     |
| Penelope                        | 3                 | 0.18                     | ~ 0      |
| LINEs                           | 1465              | 712.18                   | 1.95     |
| R2/R4/NeSL                      | 1                 | 0.70                     | ~ 0      |
| RTE/Bov-B                       | 262               | 168.76                   | 0.46     |
| L1/CIN4                         | 1196              | 542.66                   | 1.48     |
| LTR elements                    | 8703              | 12297.34                 | 33.62    |
| Ty1 / Copia                     | 3034              | 5308.85                  | 14.51    |
| Gypsy / DIRS1                   | 5548              | 6966.01                  | 19.04    |
| DNA transposons                 | 12496             | 2901.88                  | 7.93     |
| hobo-Activator                  | 1381              | 327.70                   | 0.90     |
| Tc1-IS630-Pogo                  | 1883              | 323.28                   | 0.88     |
| En-Spm (CACTA elements)         | 2763              | 856.36                   | 2.34     |
| MuDR-IS905                      | 1430              | 444.29                   | 1.21     |
| Tourist/Harbinger               | 2649              | 494.28                   | 1.35     |
| Rolling-circles                 | 736               | 185.54                   | 0.51     |
| Unclassified                    | 157               | 37.47                    | 0.10     |
| Total interspersed repeats (RM) | 54007             | 16142.21                 | 44.13    |
| <br>                            |                   |                          |          |
| Additional sugarcane LTR-RT     | -                 | 1927.20                  | 5.27     |
| Total interspersed repeats      | -                 | 18069.41                 | 49.40    |
| <br>                            |                   |                          |          |
| Satellites                      | 210               | 157.68                   | 0.43     |
| rDNA (SHCRBa_039_D18)           | 14                | 122.95                   | 3.36     |
