# Supplementary material for: Building the sugarcane genome for biotechnology and identifying evolutionary trends
Source: PubMed Central journal article supplement (PMC4122759; doi:10.1186/1471-2164-15-540), 2014-06-30
Supplement: 12864_2013_6311_MOESM10_ESM.pdf [file 12864_2013_6311_MOESM10_ESM.pdf]

**Table S5. Detailed annotation of the sucrose and starch pathway genes and RNA-seq mapping.**

| EC number   | Sugarcane gene       | # RNA-seq reads mapped | Enzyme product                          |
|-------------|----------------------|------------------------|-----------------------------------------|
| ec:2.4.1.12 | SHCRBa_170_C07_R_370 | 6237                   | cellulose synthase                      |
| ec:2.4.1.13 | SHCRBa_119_B13_R_140 | 1698                   | sucrose synthase                        |
| ec:2.4.1.13 | SHCRBa_008_B11_R_90  | 918                    | sucrose synthase                        |
| ec:2.4.1.14 | SHCRBa_014_G09_R_60  | 341                    | sucrose phosphate synthase              |
| ec:2.4.1.14 | SHCRBa_001_G20_F_90  | 235                    | sucrose phosphate synthase              |
| ec:2.4.1.14 | SHCRBa_063_N24_F_230 | 224                    | sucrose phosphate synthase              |
| ec:2.4.1.14 | SHCRBa_179_G22_F_90  | 207                    | sucrose phosphate synthase              |
| ec:2.4.1.14 | SHCRBa_181_K17_F_90  | 174                    | sucrose phosphate synthase              |
| ec:2.4.1.18 | SHCRBa_082_J13_F_70  | 3625                   | 1,4-alpha-glucan branching enzyme       |
| ec:2.4.1.21 | SHCRBa_260_G18_F_100 | 547                    | starch synthase                         |
| ec:2.7.7.27 | SHCRBa_026_K06_F_10  | 5065                   | glucose-1-phosphate adenylyltransferase |
| ec:2.7.7.27 | SHCRBa_078_K12_F_350 | 3418                   | glucose-1-phosphate adenylyltransferase |
| ec:2.7.7.27 | SHCRBa_003_M06_R_10  | 1295                   | glucose-1-phosphate adenylyltransferase |
| ec:2.7.7.27 | SHCRBa_119_J13_R_150 | 501                    | glucose-1-phosphate adenylyltransferase |
| ec:2.7.7.27 | SHCRBa_073_J10_R_160 | 448                    | glucose-1-phosphate adenylyltransferase |
| ec:2.7.7.27 | SHCRBa_033_L20_R_100 | 448                    | glucose-1-phosphate adenylyltransferase |
| ec:2.7.7.27 | SHCRBa_027_I16_R_250 | 443                    | glucose-1-phosphate adenylyltransferase |
| ec:2.7.7.27 | SHCRBa_009_B01_R_20  | 79                     | glucose-1-phosphate adenylyltransferase |
| ec:2.7.7.27 | SHCRBa_012_A01_R_60  | 63                     | glucose-1-phosphate adenylyltransferase |
| ec:2.7.7.27 | SHCRBa_022_D05_R_200 | 22                     | glucose-1-phosphate adenylyltransferase |
| ec:2.7.7.27 | SHCRBa_022_D05_R_110 | 4                      | glucose-1-phosphate adenylyltransferase |
| ec:2.7.7.9  | SHCRBa_024_H17_F_300 | 2358                   | UDP glucose pyrophosphorylase           |
| ec:3.1.1.11 | SHCRBa_026_H12_R_50  | 24                     | pectinaesterase                         |
| ec:3.1.3.24 | SHCRBa_104_G22_F_10  | 109                    | sucrose-6-phosphate phosphohydrolase    |
| ec:3.2.1.15 | SHCRBa_170_C07_F_90  | 23                     | polygalacturonase                       |
| ec:3.2.1.2  | SHCRBa_185_C01_F_180 | 311                    | beta-amylase                            |
| ec:3.2.1.26 | SHCRBa_119_J13_R_30  | 2                      | beta-fructofuranosidase                 |
| ec:3.2.1.37 | SHCRBa_026_H12_F_40  | 1894                   | xylan 1,4-beta-xylosidase               |
| ec:5.4.2.2  | SHCRBa_018_K13_F_200 | 15413                  | phosphoglucomutase                      |
